# Supplementary material for: Explainable Machine Learning to Predict Successful Weaning of Mechanical Ventilation in Critically Ill Patients Requiring Hemodialysis
Source: MDPI journal article supplement (doi:10.3390/healthcare11060910), 2023-03-21
Supplement: s1 [file s1]

**Supplemental Table 1. The applied parameters in the XGBoost, GBM, AdaBoost, and RF.**

---

**XGBoost**

{'objective': 'binary:logistic', 'use\_label\_encoder': None, 'base\_score': None, 'booster': 'gbtree', 'callbacks': None, 'colsample\_bylevel': 1, 'colsample\_bynode': 1, 'colsample\_bytree': 1, 'early\_stopping\_rounds': None, 'enable\_categorical': False, 'eval\_metric': 'auc', 'feature\_types': None, 'gamma': 0, 'gpu\_id': None, 'grow\_policy': 'depthwise', 'importance\_type': None, 'interaction\_constraints': None, 'learning\_rate': 0.3, 'max\_bin': 256, 'max\_cat\_threshold': None, 'max\_cat\_to\_onehot': None, 'max\_delta\_step': 0, 'max\_depth': 6, 'max\_leaves': 0, 'min\_child\_weight': 1, 'missing': nan, 'monotone\_constraints': None, 'n\_estimators': 100, 'n\_jobs': None, 'num\_parallel\_tree': 1, 'predictor': 'auto', 'random\_state': None, 'reg\_alpha': 0, 'reg\_lambda': 0, 'sampling\_method': 'uniform', 'scale\_pos\_weight': 1, 'subsample': 1, 'tree\_method': 'auto', 'validate\_parameters': 'false', 'verbosity': 1}

**GBM**

{'ccp\_alpha': 0.0, 'criterion': 'friedman\_mse', 'init': None, 'learning\_rate': 0.1, 'loss': 'log\_loss', 'max\_depth': 3, 'max\_features': None, 'max\_leaf\_nodes': None, 'min\_impurity\_decrease': 0.0, 'min\_samples\_leaf': 1, 'min\_samples\_split': 2, 'min\_weight\_fraction\_leaf': 0.0, 'n\_estimators': 100, 'n\_iter\_no\_change': None, 'random\_state': None, 'subsample': 1.0, 'tol': 0.0001, 'validation\_fraction': 0.1, 'verbose': 0, 'warm\_start': False}

**AdaBoost**

{'algorithm': 'SAMME.R', 'base\_estimator': 'deprecated', 'estimator': None, 'learning\_rate': 1.0, 'n\_estimators': 50, 'random\_state': None}

**RF**

{'bootstrap': True, 'ccp\_alpha': 0.0, 'class\_weight': None, 'criterion': 'gini', 'max\_depth': None, 'max\_features': 'sqrt', 'max\_leaf\_nodes': None, 'max\_samples': None, 'min\_impurity\_decrease': 0.0, 'min\_samples\_leaf': 1, 'min\_samples\_split': 2, 'min\_weight\_fraction\_leaf': 0.0, 'n\_estimators': 100, 'n\_jobs': None, 'oob\_score': False, 'random\_state': None, 'verbose': 0, 'warm\_start': False}

---

Abbreviation: Extreme gradient boosting, XGBoost; Gradient Boosting Machine, GBM;

Adaptive Boosting, AdaBoost; Random Forest (RF)

**Supplemental Table 2. Metrics of performance among distinct machine learning models**

|                 | Accuracy <sup>a</sup> | Recall      | F1 score    | PPV         | NPV         |
|-----------------|-----------------------|-------------|-------------|-------------|-------------|
| <b>XGBoost</b>  | 0.742±0.006           | 0.741±0.012 | 0.736±0.006 | 0.768±0.016 | 0.732±0.09  |
| <b>GBM</b>      | 0.739±0.018           | 0.742±0.018 | 0.728±0.022 | 0.762±0.012 | 0.715±0.026 |
| <b>ADABOOST</b> | 0.692±0.014           | 0.71±0.028  | 0.691±0.012 | 0.712±0.035 | 0.674±0.012 |
| <b>RF</b>       | 0.695±0.011           | 0.655±0.037 | 0.669±0.015 | 0.704±0.024 | 0.686±0.029 |

<sup>a</sup> (TP+TN) / (TP+FN+TN+FP). Abbreviation: XGBoost, eXtreme Gradient Boosting; GBM, Gradient Boosting Machine; AdaBoost, Adaptive Boosting; RF, Random Forest.

**Supplemental Table 3. Delong test to determine the difference of performance among distinct machine learning models**

|                 | <b>XGBoost</b> | <b>GBM</b> | <b>ADABOOST</b> | <b>RF</b> |
|-----------------|----------------|------------|-----------------|-----------|
| <b>XGBoost</b>  | NA             | 0.146      | <0.01           | <0.01     |
| <b>GBM</b>      | 0.146          | NA         | <0.01           | 0.011     |
| <b>ADABOOST</b> | <0.01          | <0.01      | NA              | 0.06      |
| <b>RF</b>       | <0.01          | <0.01      | 0.06            | NA        |

Abbreviation: XGBoost, eXtreme Gradient Boosting; GBM, Gradient Boosting Machine; AdaBoost, Adaptive Boosting; RF, Random Forest.

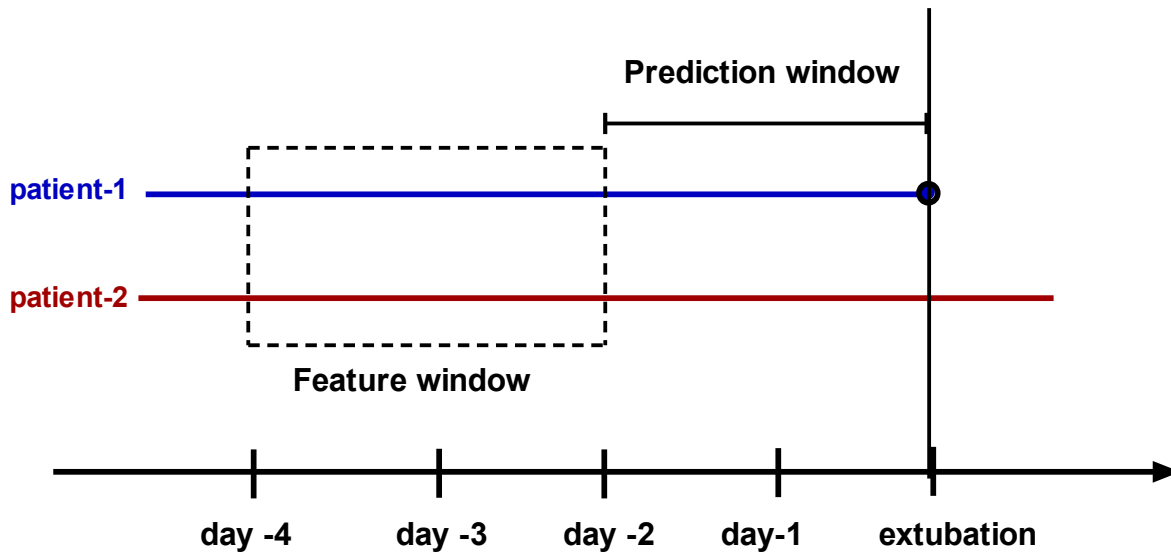

**Supplemental Figure 1. Illustration of the study design and the time frame with right alignment.** Subjects were aligned at the alignment point that was extubation-day or one random-day in those without extubation. The data within prediction window (day -4 and day -3 prior to extubation-day) were collected, and the prediction window reflects the time of the prediction ahead of extubation.
